# Supplementary material for: Dual functionalized brush copolymers as versatile antifouling coatings
Source: Royal Society of Chemistry journal article supplement (doi:10.1039/d2tb02522a), 2023-01-01
Supplement: d2tb02522a1.pdf [file d2tb02522a1.pdf]

## Dual Functionalized Brush Copolymers as Versatile Antifouling Coatings

Jihyo Kil,<sup>‡a</sup> Rafia Tasnim Rahman,<sup>‡b</sup> Wenxuan Wang,<sup>a</sup> Saehan Choi,<sup>b</sup> Yoon Sung Nam,<sup>\*b</sup> and Sheng Li<sup>\*a</sup>

<sup>a</sup>Department of Chemical and Biomolecular Engineering, Korea Advanced Institute of Science and Technology (KAIST), Daejeon 34141, Republic of Korea

<sup>b</sup>Department of Materials Science and Engineering, Korea Advanced Institute of Science and Technology (KAIST), Daejeon 34141, Republic of Korea

<sup>‡</sup>These authors contribute equally to this work.

\*Correspondence should be addressed to Sheng Li (shengli@kaist.ac.kr) and Yoon Sung Nam (yoonsung@kaist.ac.kr).

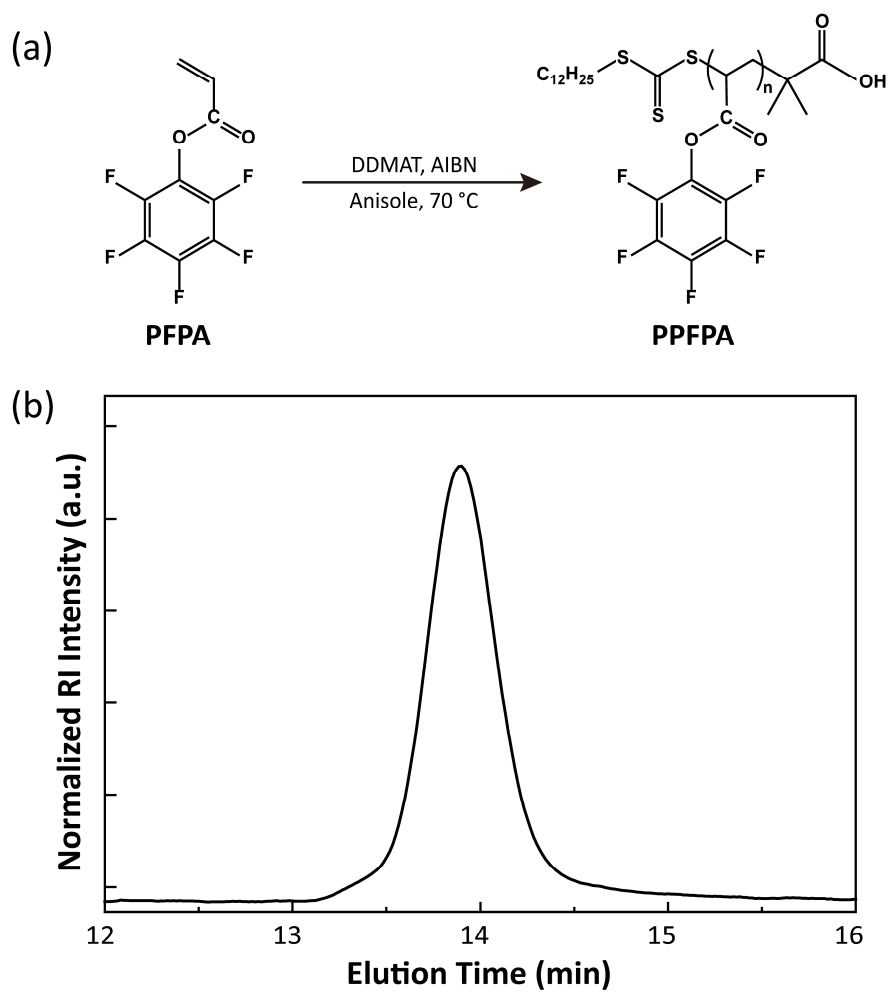

**Fig. S1** (a) Synthesis scheme and (b) THF SEC elution profile of PPFPA precursor polymer.

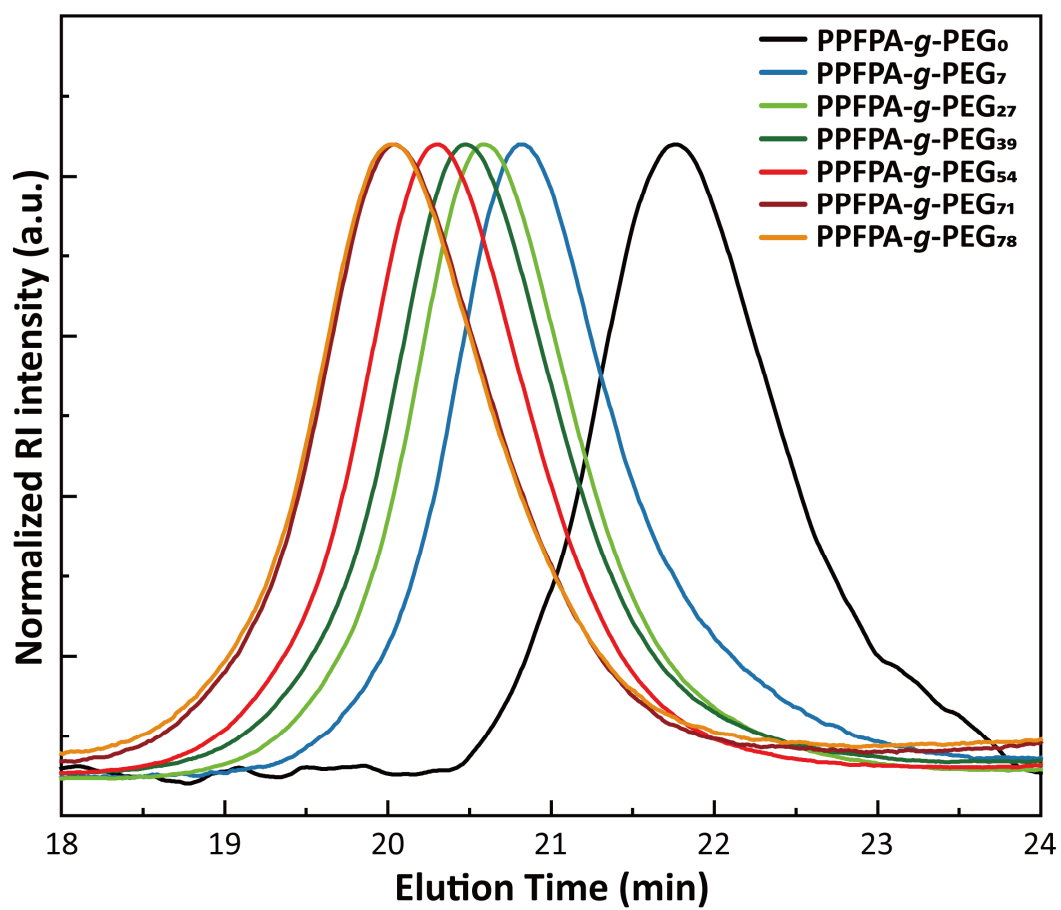

**Fig. S2** DMF SEC elution profiles of PPFPA-*g*-PEG with different mol% of PEG side chain substitution.

**Table S1** Copolymer Coating Thickness Analysis by Ellipsometry

| Samples                                                           |       | Thickness (nm)     |                    |                        |
|-------------------------------------------------------------------|-------|--------------------|--------------------|------------------------|
| Name                                                              | Code  | APTES <sup>a</sup> | Total <sup>a</sup> | Copolymer <sup>b</sup> |
| PPFPA- <i>g</i> -PEG <sub>0</sub> - <i>g</i> -PDMS <sub>83</sub>  | 0-83  | 11.1 ± 0.9         | 15.1 ± 1.2         | 4.0                    |
| PPFPA- <i>g</i> -PEG <sub>7</sub> - <i>g</i> -PDMS <sub>73</sub>  | 7-73  | 19.9 ± 0.9         | 24.1 ± 1.5         | 4.2                    |
| PPFPA- <i>g</i> -PEG <sub>27</sub> - <i>g</i> -PDMS <sub>57</sub> | 27-57 | 5.2 ± 1.0          | 11.0 ± 1.5         | 5.8                    |
| PPFPA- <i>g</i> -PEG <sub>39</sub> - <i>g</i> -PDMS <sub>46</sub> | 39-46 | 4.2 ± 0.4          | 10.3 ± 1.0         | 6.1                    |
| PPFPA- <i>g</i> -PEG <sub>54</sub> - <i>g</i> -PDMS <sub>30</sub> | 54-30 | 7.3 ± 1.1          | 13.7 ± 1.3         | 6.4                    |
| PPFPA- <i>g</i> -PEG <sub>71</sub> - <i>g</i> -PDMS <sub>12</sub> | 71-12 | 12.3 ± 1.0         | 20.4 ± 1.2         | 8.1                    |
| PPFPA- <i>g</i> -PEG <sub>78</sub> - <i>g</i> -PDMS <sub>0</sub>  | 78-0  | 17.9 ± 0.9         | 26.1 ± 1.0         | 8.2                    |

<sup>a</sup>Average thickness value obtained by measuring 5 different spots per sample. <sup>b</sup>Calculated by subtracting APTES thickness from total coating thickness.

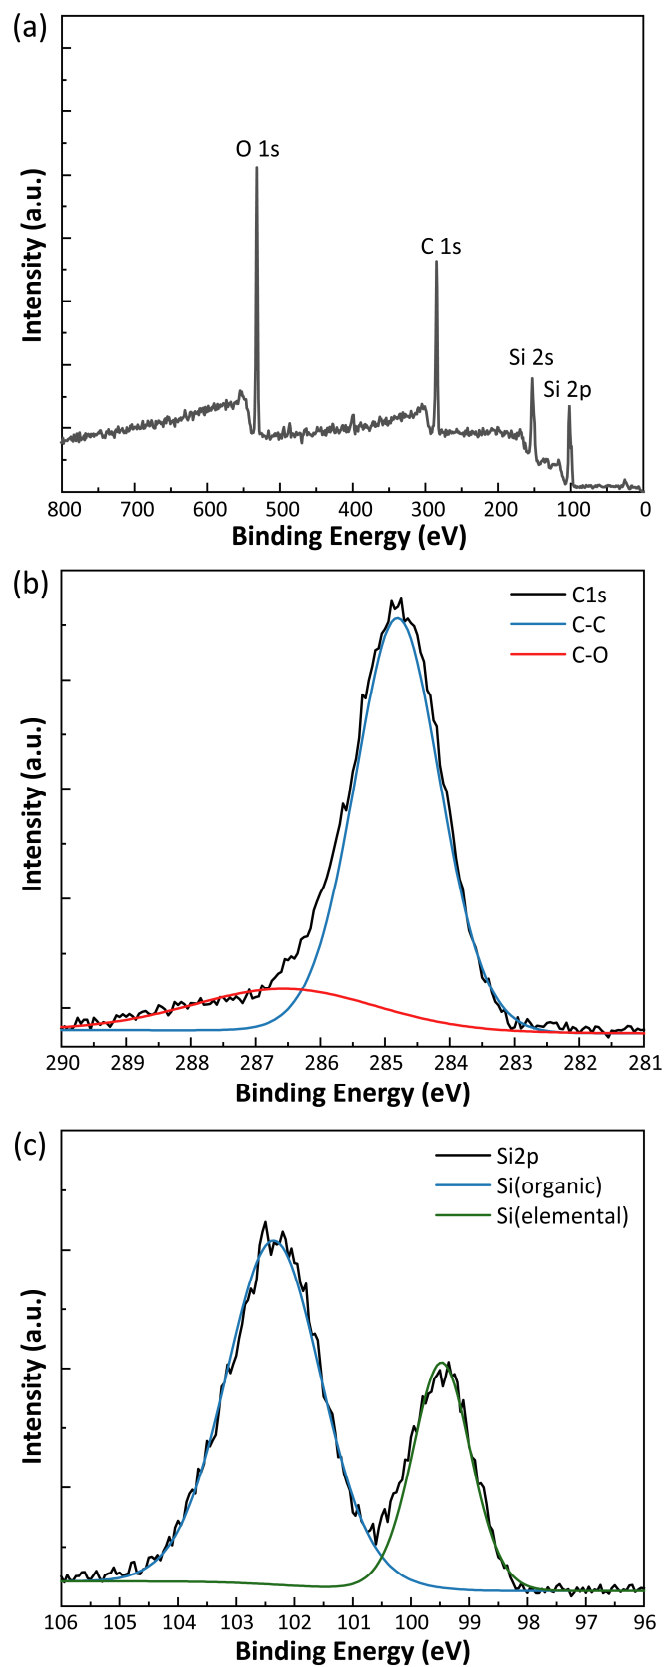

**Fig. S3** XPS (a) survey spectrum and deconvoluted regions corresponding to (b) C1s and (c) Si2p for PPFPA-*g*-PEG<sub>0</sub>-*g*-PDMS<sub>83</sub>.

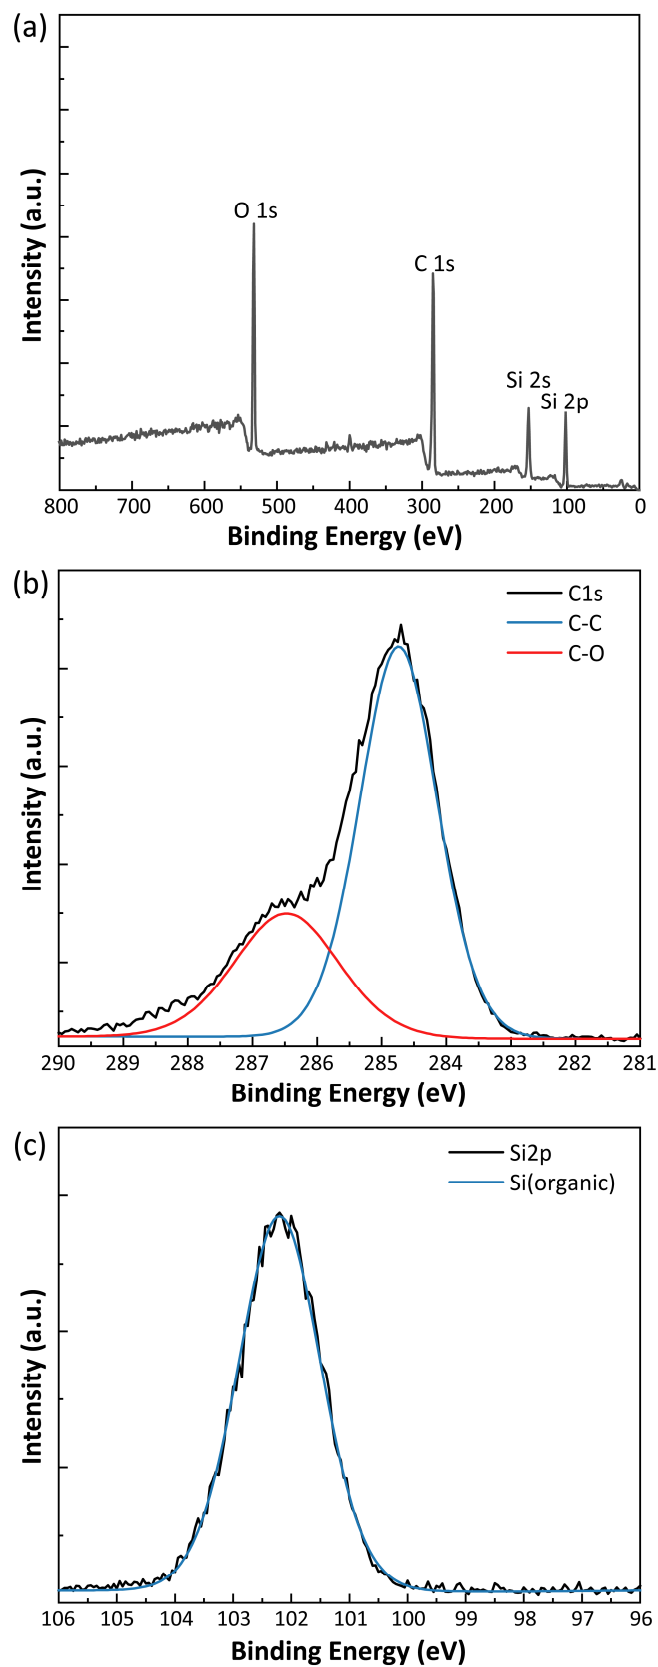

**Fig. S4** XPS (a) survey spectrum and deconvoluted regions corresponding to (b) C1s and (c) Si2p for PPFPA-*g*-PEG<sub>7</sub>-*g*-PDMS<sub>73</sub>.

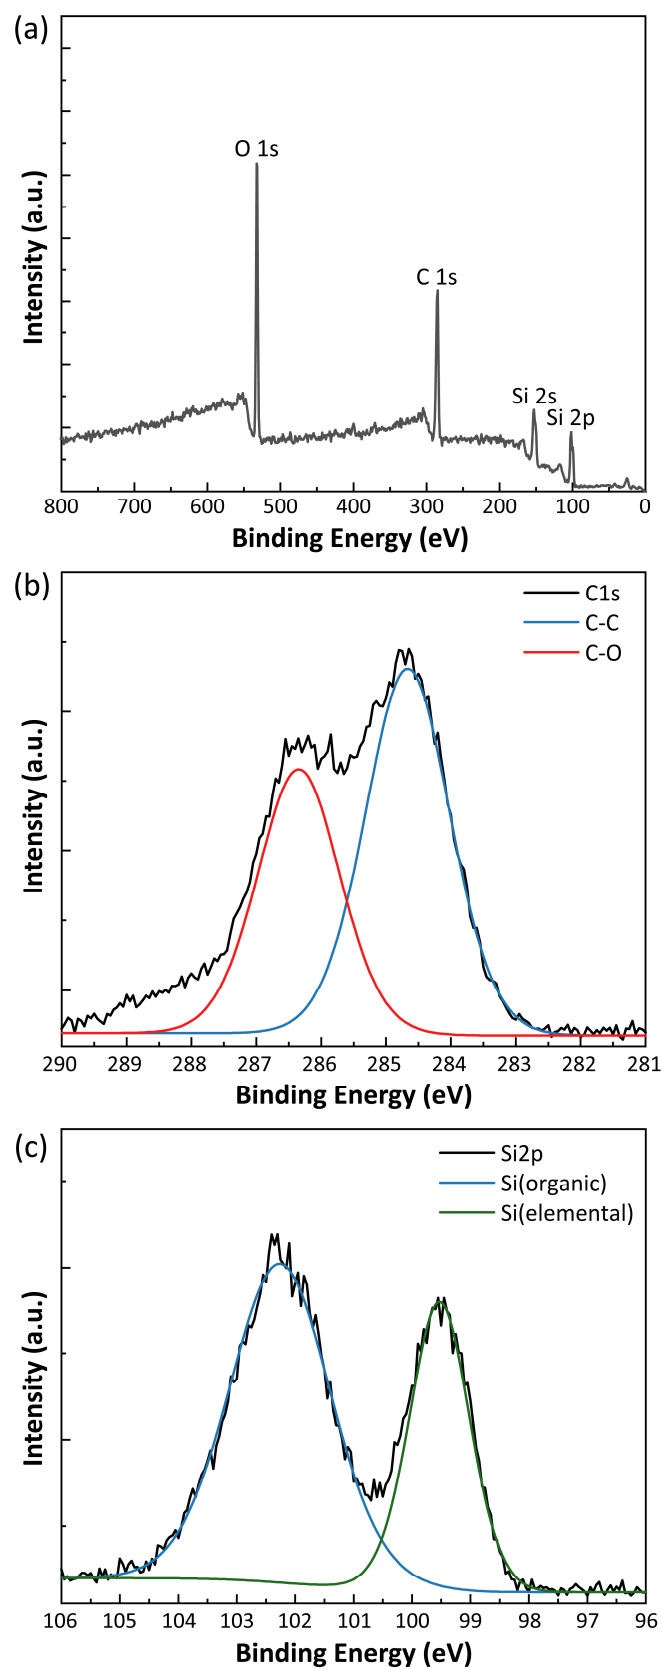

**Fig. S5** XPS (a) survey spectrum and deconvoluted regions corresponding to (b) C1s and (c) Si2p for PPFPA-*g*-PEG<sub>27</sub>-*g*-PDMS<sub>57</sub>.

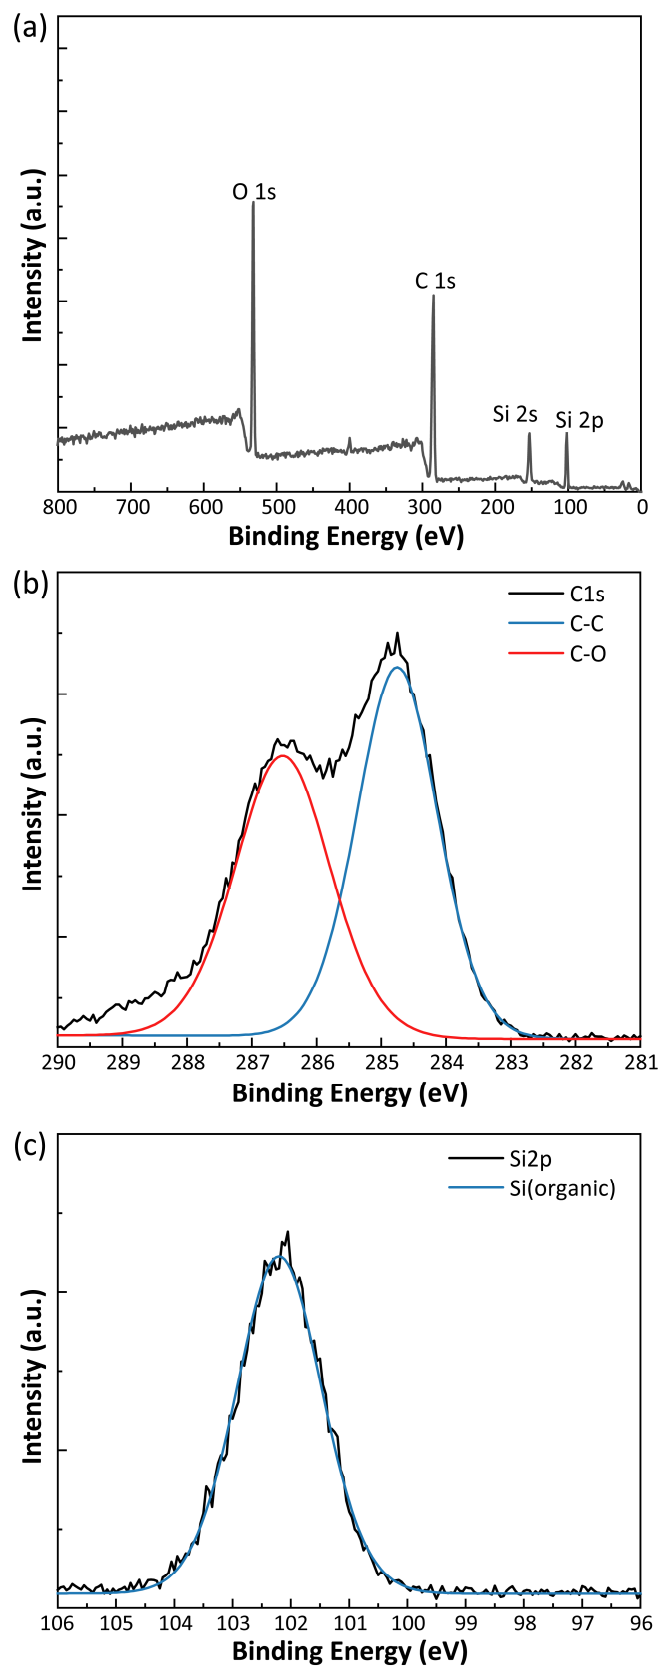

**Fig. S6** XPS (a) survey spectrum and deconvoluted regions corresponding to (b) C1s and (c) Si2p for PPFPA-*g*-PEG<sub>39</sub>-*g*-PDMS<sub>46</sub>.



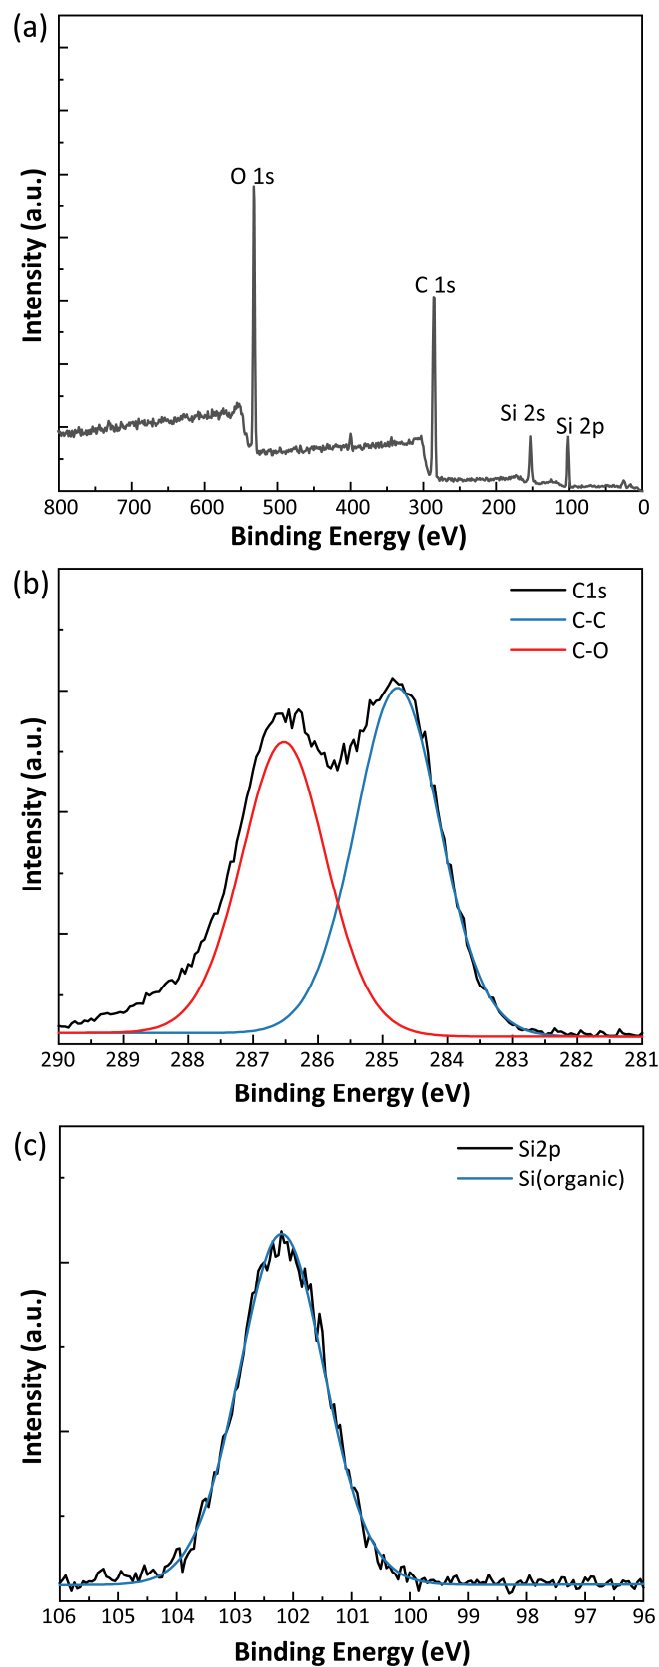

**Fig. S7** XPS (a) survey spectrum and deconvoluted regions corresponding to (b) C1s and (c) Si2p for PPFPA-*g*-PEG<sub>54</sub>-*g*-PDMS<sub>30</sub>.

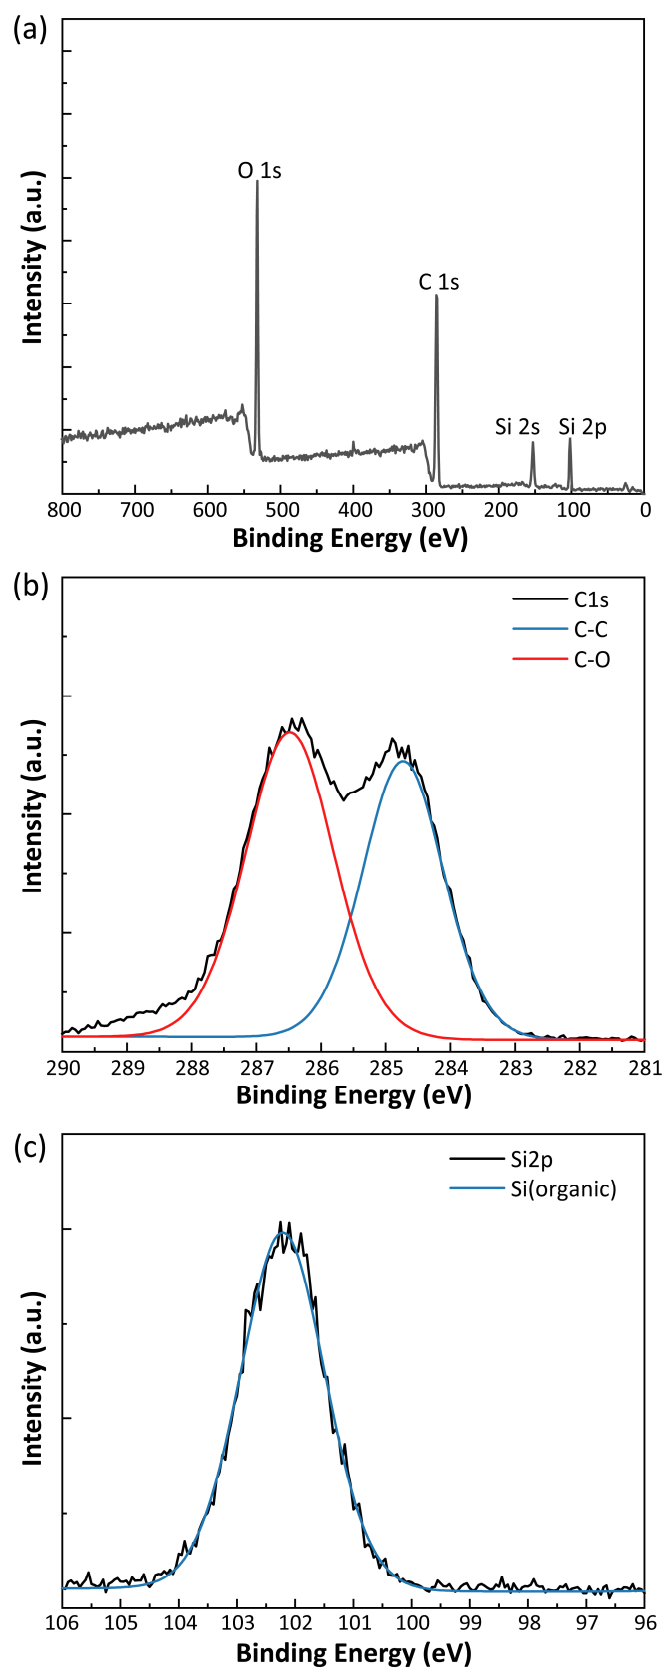

**Fig. S8** XPS (a) survey spectrum and deconvoluted regions corresponding to (b) C1s and (c) Si2p for PPFPA-*g*-PEG<sub>71</sub>-*g*-PDMS<sub>12</sub>.

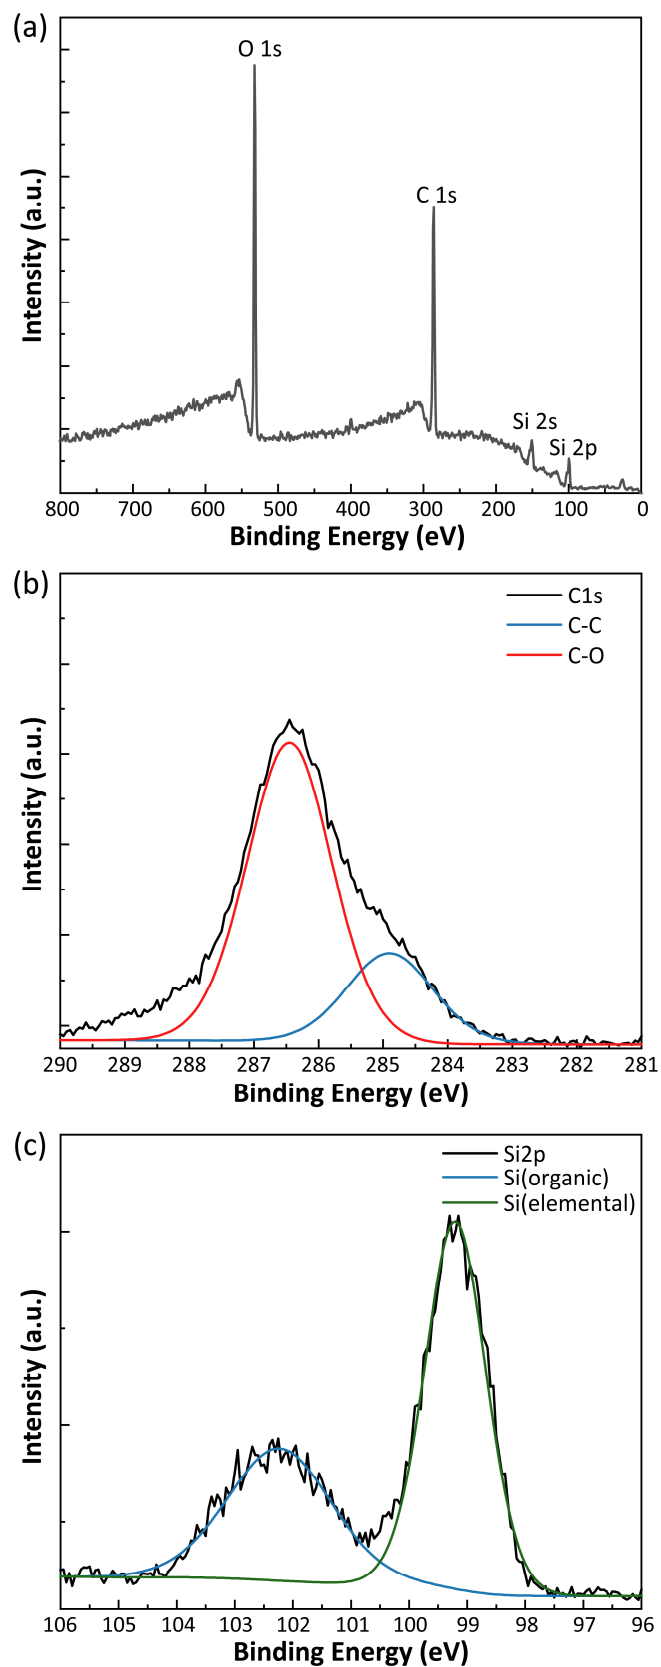

**Fig. S9** XPS (a) survey spectrum and deconvoluted regions corresponding to (b) C1s and (c) Si2p for PPFPA-*g*-PEG<sub>78</sub>-*g*-PDMS<sub>0</sub>.

**Table S2** Surface Elemental Analysis of PPFPA-*g*-PEG-*g*-PDMS Coatings

| Samples                                                           |       | C-O<br>(Atomic %) |      | Si(organic)<br>(Atomic %)* |      |
|-------------------------------------------------------------------|-------|-------------------|------|----------------------------|------|
| Name                                                              | Code  | Theo.             | Exp. | Theo.                      | Exp. |
| PPFPA- <i>g</i> -PEG <sub>0</sub> - <i>g</i> -PDMS <sub>83</sub>  | 0-83  | 1.7               | 8.7  | 22.3                       | 22.8 |
| PPFPA- <i>g</i> -PEG <sub>7</sub> - <i>g</i> -PDMS <sub>73</sub>  | 7-73  | 4.9               | 18.2 | 20.0                       | 18.4 |
| PPFPA- <i>g</i> -PEG <sub>27</sub> - <i>g</i> -PDMS <sub>57</sub> | 27-57 | 13.2              | 24.4 | 14.4                       | 15.5 |
| PPFPA- <i>g</i> -PEG <sub>39</sub> - <i>g</i> -PDMS <sub>46</sub> | 39-46 | 17.8              | 28.7 | 11.3                       | 14.1 |
| PPFPA- <i>g</i> -PEG <sub>54</sub> - <i>g</i> -PDMS <sub>30</sub> | 54-30 | 23.6              | 29.6 | 7.2                        | 13.4 |
| PPFPA- <i>g</i> -PEG <sub>71</sub> - <i>g</i> -PDMS <sub>12</sub> | 71-12 | 30.0              | 33.1 | 2.8                        | 12.1 |
| PPFPA- <i>g</i> -PEG <sub>78</sub> - <i>g</i> -PDMS <sub>0</sub>  | 78-0  | 34.0              | 46.0 | 0                          | 5.7  |

\*Note Si(organic) for low PDMS substituted samples show higher experimentally measured percentage values due to contributions from APTES linkers.

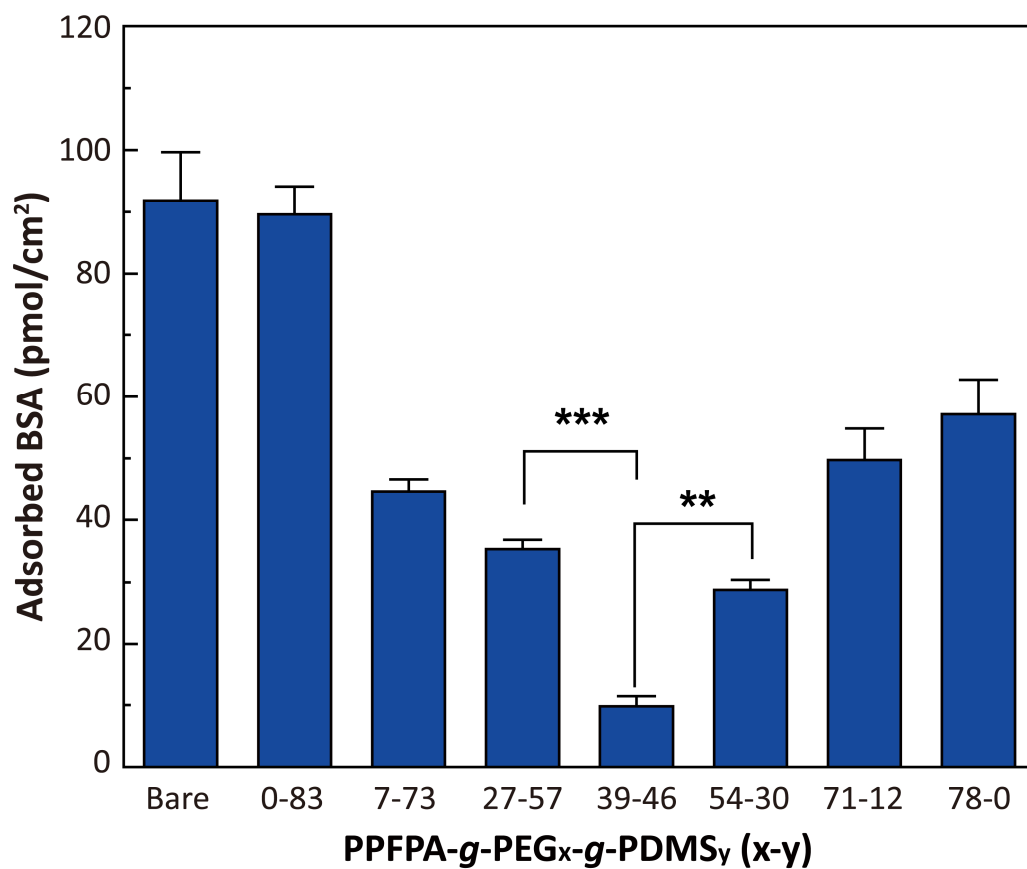

**Fig. S10** Quantified average numbers of BSA adsorbed on bare Si surface and PPFPA-*g*-PEG-*g*-PDMS copolymer-coated Si surfaces ( $n = 3$ , and the error bars denote standard deviation). \*\* and \*\*\* represent  $p$ -values less than 0.01 and 0.001, respectively.

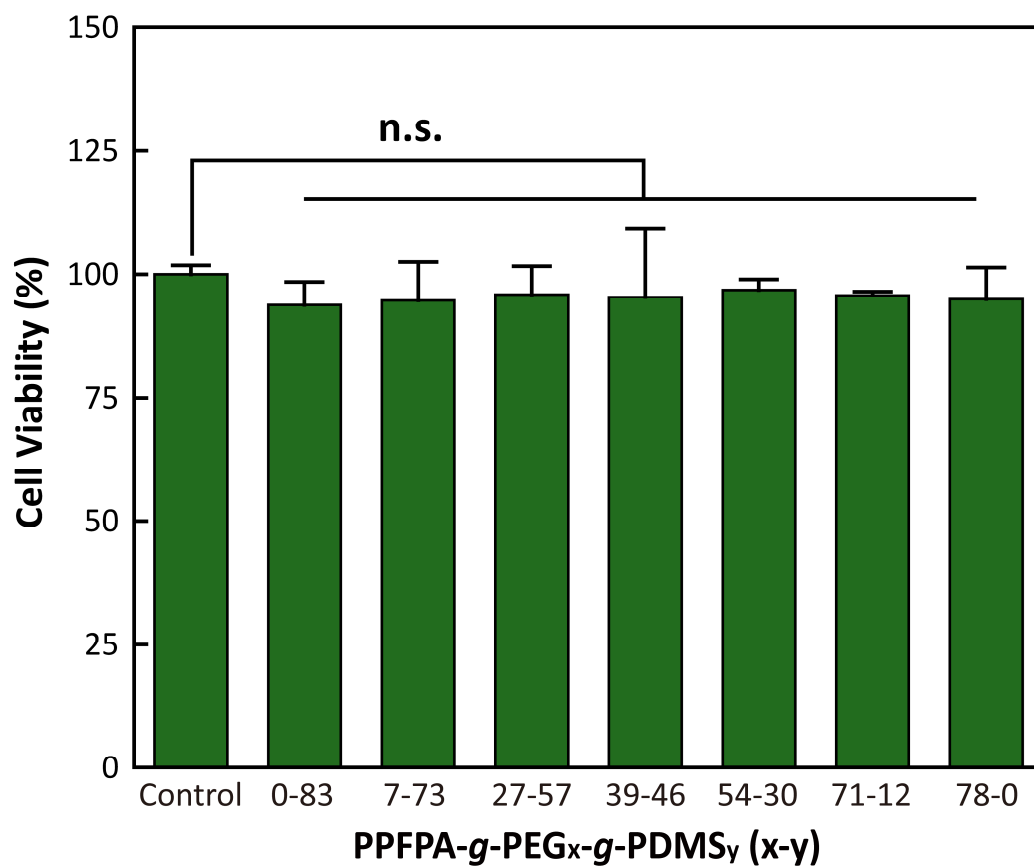

**Fig. S11** Cytotoxicity of the PPFPA-*g*-PEG-*g*-PDMS copolymers against A549 cells (n = 5, and the error bars denote standard deviation). Control represents A549 cells without polymer addition. n.s. represents non-significant.

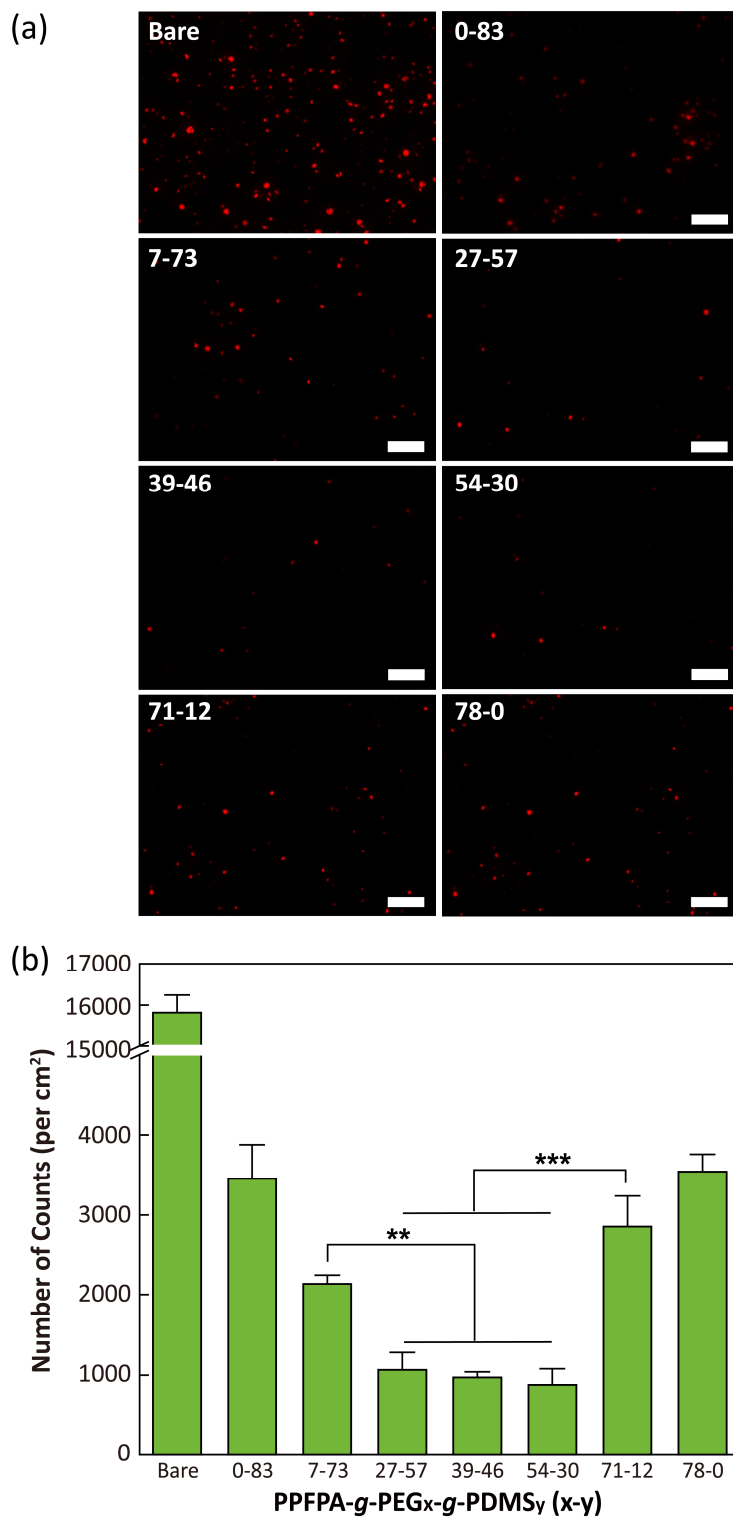

**Fig. S12** (a) Fluorescence microscopy images of *C. vulgaris* settled on bare Si surface and PPFPA-*g*-PEG-*g*-PDMS copolymer-coated Si surfaces after 3 days (scale bar: 20  $\mu$ m). (b) Quantified average numbers of attached *C. vulgaris* ( $n = 3$ , and the error bars denote standard deviation). \*\* indicates a  $p$ -value of 0.01. \*\*\* indicates a  $p$ -value of 0.001.

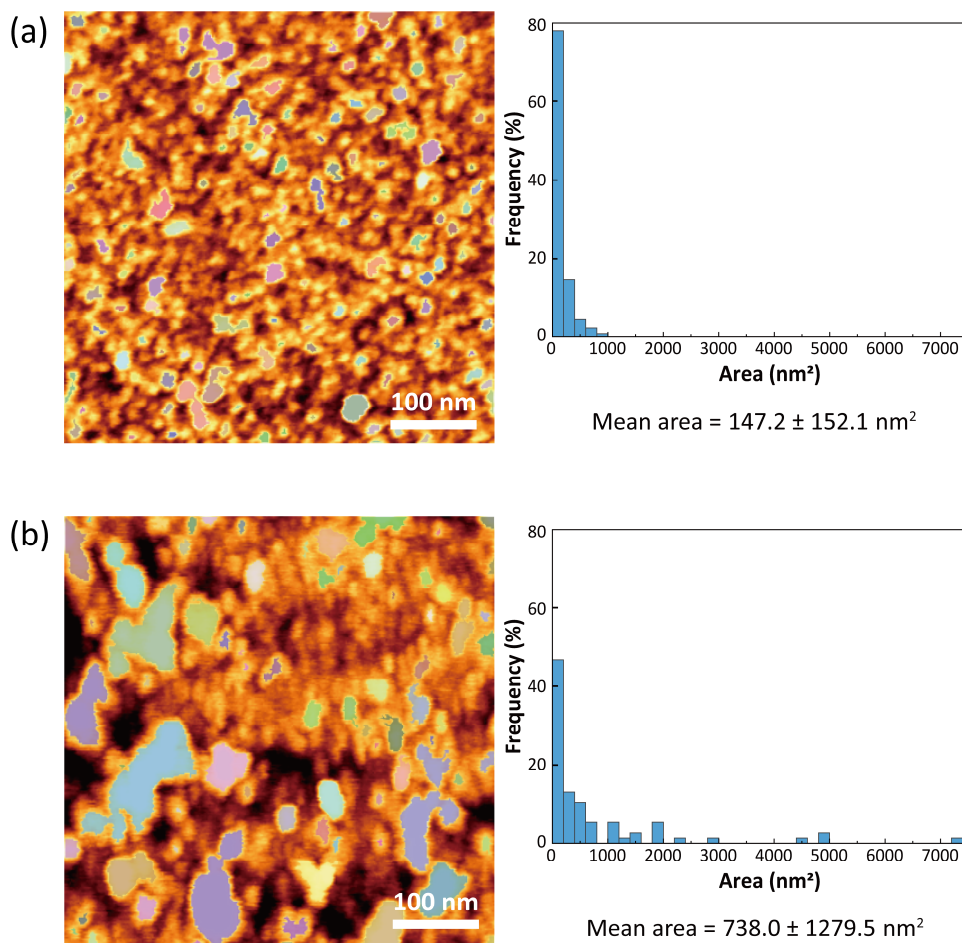

**Fig. S13** AFM measured surface domain size analysis for (a) PPFPA-*g*-PEG<sub>39</sub>-*g*-PDMS<sub>46</sub> and (b) PPFPA-*g*-PEG<sub>54</sub>-*g*-PDMS<sub>30</sub>. For each sample, its height image is analyzed to color-mark all regions with heights above a threshold value of 0.5 nm. The domain sizes of the color-marked regions are then calculated using Park systems XEI software, with the results summarized in the histogram.
